# Supplementary material for: Phylogenetic Studies of the Three RNA Silencing Suppressor Genes of South American CTV Isolates Reveal the Circulation of a Novel Genetic Lineage
Source: MDPI journal article supplement (doi:10.3390/v7072814), 2015-07-22
Supplement: s1 [file s1]

## Supplementary Materials

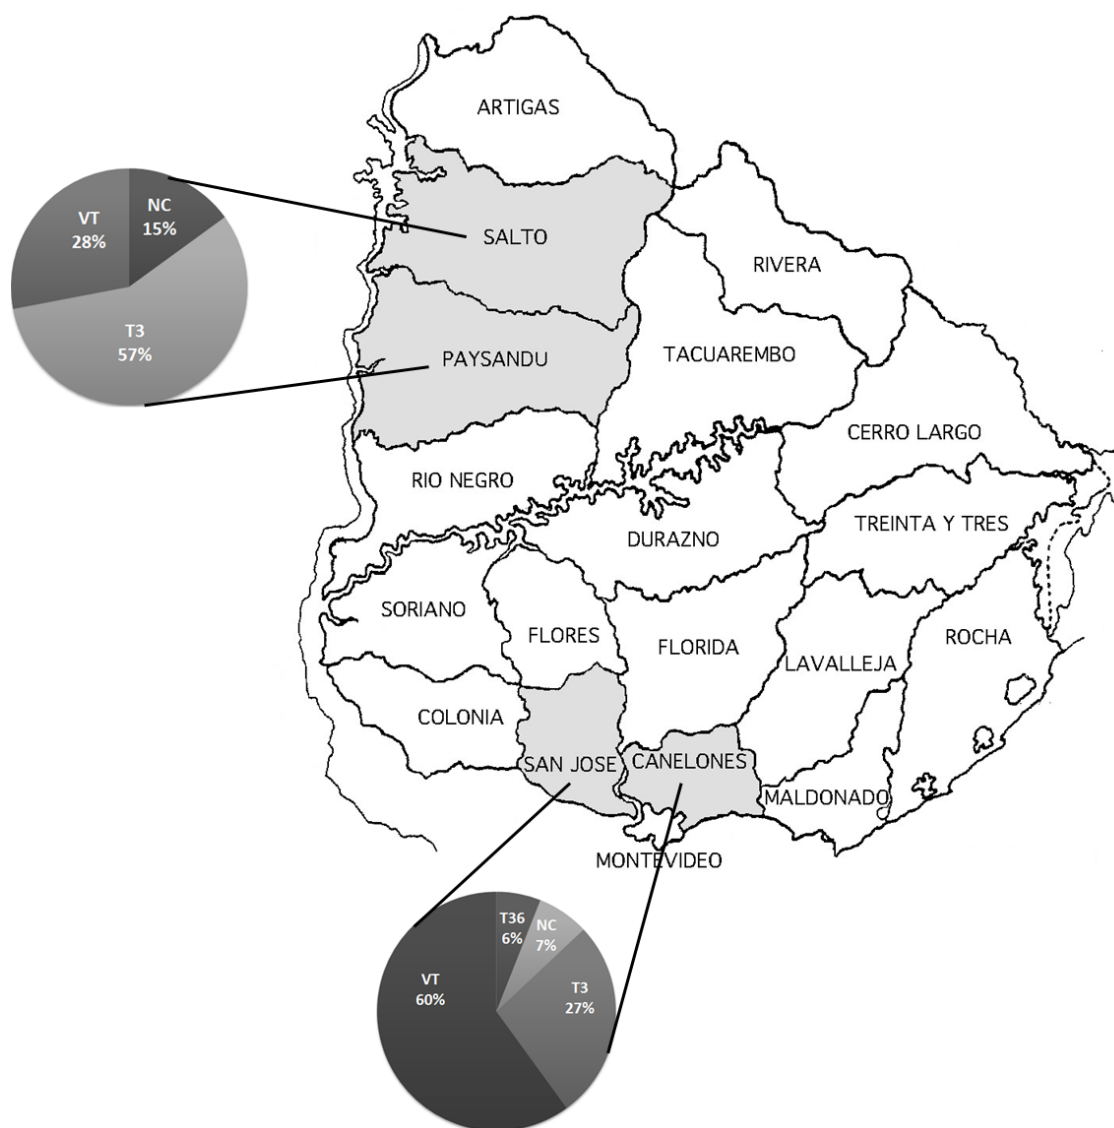

**Figure S1.** Genotype geographic distribution. Percentage of DNA clones per genotype, for p20 gene in the citrus growing areas of Uruguay.

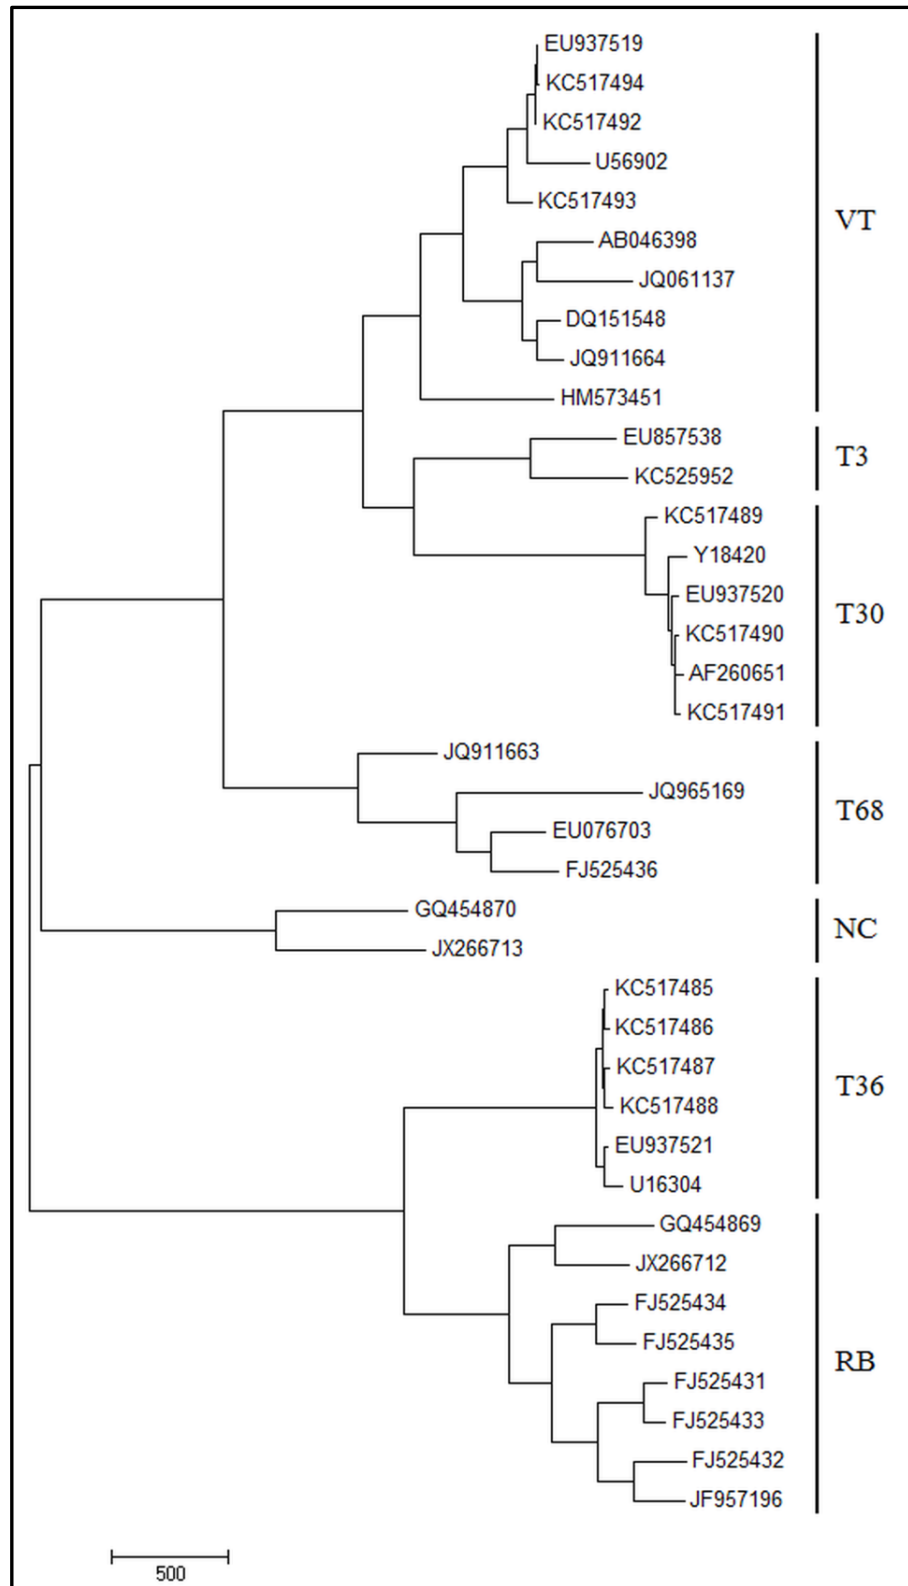

(A)

**Figure S2.***Cont.*

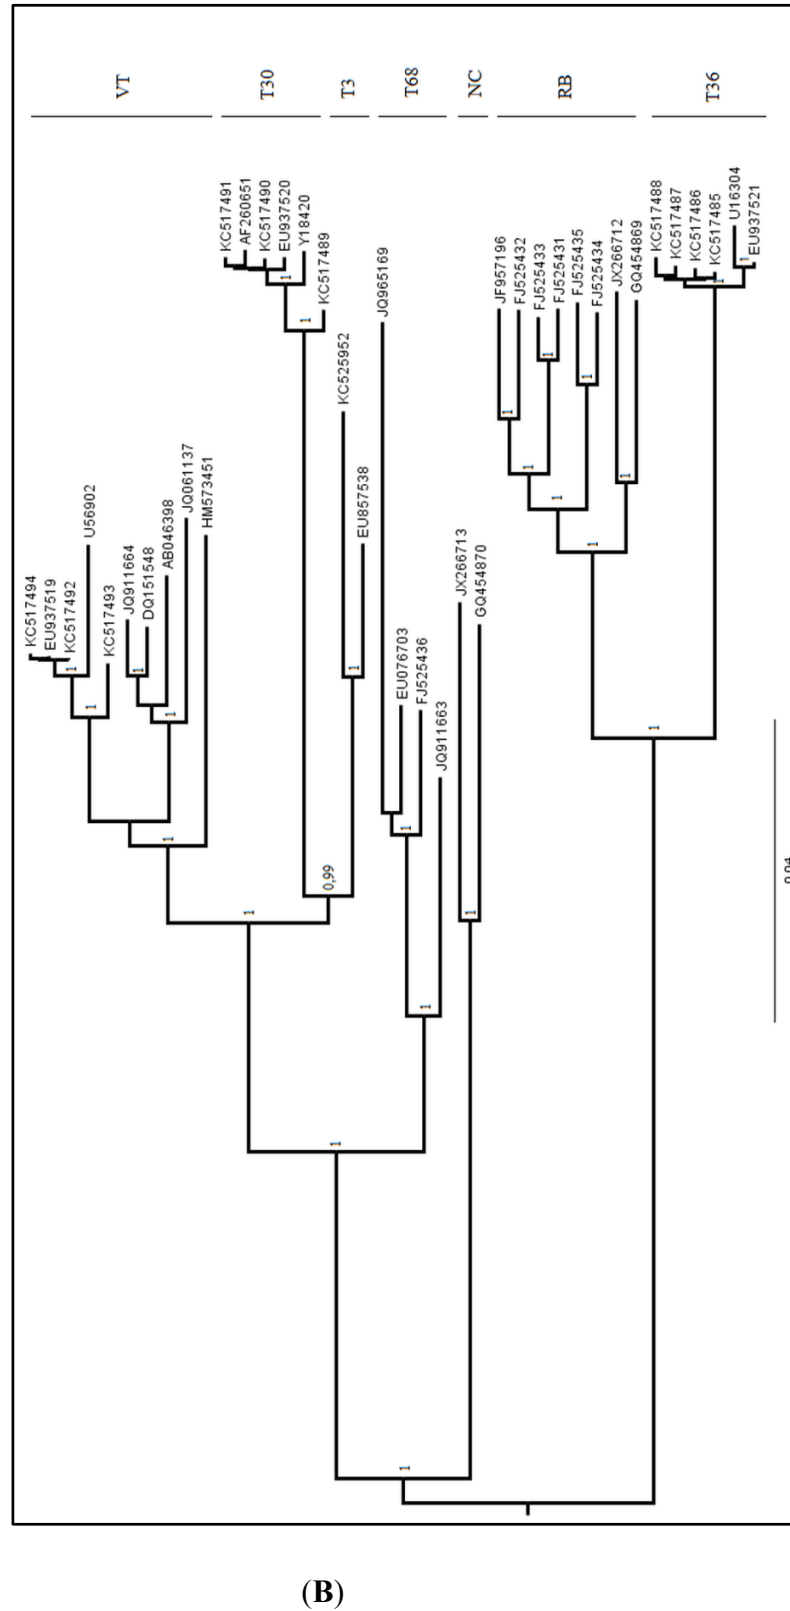

**Figure S2.** Complete genomes phylogenetic trees of *Citrus Tristeza Virus* isolates. Dataset was composed by isolates from Harper (2013) and Taiwanese strains JX266712-JX266713. (A) Maximum Parsimony method was used in the analysis. (B) Maximum Likelihood method with HKY nucleotide substitution model and aLRT test to estimate nodes support where used. aLRT values are shown. GenBank accession numbers of strains used are given.
